# Supplementary material
Source: PubMed Central journal article supplement (PMC3447037)
Supplement: supp_112153v1_event-matlow-1-at.pdf [file supp_112153v1_event-matlow-1-at.pdf]

**Appendix 1 (as supplied by authors): Participating centres by geographic node.**

**Appendix 1. Participating centres by geographic node**

| Geographic Node       | APC                                                                               | CH-1                                                 | CH-2                                                   |
|-----------------------|-----------------------------------------------------------------------------------|------------------------------------------------------|--------------------------------------------------------|
| British Columbia (BC) | BC Children's Hospital                                                            | Lionsgate Hospital                                   | Victoria General Hospital                              |
| Alberta-North         | Stollery Children's Hospital                                                      | Grande Prairie Care Ctr                              | Grey Nuns Community Hospital                           |
| Alberta-South         | Alberta Children's Hospital                                                       | Peter Lougheed Health Centre                         | Chinook Regional Hospital (Lethbridge)                 |
| Manitoba*             | Children's Hospital of Winnipeg and<br>l'Hôpital St-Boniface Hospital (NICU only) | Brandon Regional Health Authority                    | Burntwood Regional Health Authority                    |
| Ontario               | Hospital for Sick Children                                                        | The Credit Valley Hospital                           | North York General Hospital                            |
| Quebec                | CHU Sainte-Justine<br>IWK Health Centre and                                       | Hôpital Pierre-Le Gardeur, CSSS du Sud de Lanaudière | Hôpital régional de Saint-Jérôme, CSSS de Saint-Jérôme |
| Atlantic†             | Eastern Health, Janeway Childrens Health and<br>Rehabilitation Centre             | Annapolis Valley District Health Authority           | Western Memorial Regional Hospital                     |

\* All NICU cases for the Manitoba APC site were selected from St. Boniface Hospital

† Due to the size population size of the Atlantic Node two APCs were invited to participate and half of the APC sample was randomly selected by age group from each. The individual APCs were matched with one regional community hospital.
