# Supplementary material
Source: PubMed Central journal article supplement (PMC3447037)
Supplement: supp_112153v1_event-matlow-2-at.pdf [file supp_112153v1_event-matlow-2-at.pdf]

**Appendix 2 (as supplied by the authors): 35-Trigger Canadian Paediatric Trigger Tool applied to 3669 charts in the stage 1 review and the proportion of charts positive for each trigger.**

| <i>CARE MODULE</i>                                                                                                                                                                                                                                                                                  | Frequency<br>n (%) |
|-----------------------------------------------------------------------------------------------------------------------------------------------------------------------------------------------------------------------------------------------------------------------------------------------------|--------------------|
| Transfusion/ use of blood products                                                                                                                                                                                                                                                                  | 171 (4.7%)         |
| Any code or arrest (successfully resuscitated)                                                                                                                                                                                                                                                      | 19 (0.5%)          |
| Unplanned admission (including readmission) as a result of any health care management within the 3 months prior to OR after discharge from the index hospitalization.                                                                                                                               | 377<br>(10.3%)     |
| Infection of any kind                                                                                                                                                                                                                                                                               | 94 (2.4%)          |
| In hospital stroke                                                                                                                                                                                                                                                                                  | 6 (0.2%)           |
| Transfer to higher level of care                                                                                                                                                                                                                                                                    | 80 (2.2%)          |
| Catheter infiltration/burn                                                                                                                                                                                                                                                                          | 27 (0.7%)          |
| Complication related to Central Venous Catheter (CVC)                                                                                                                                                                                                                                               | 26 (0.7%)          |
| Necrotizing Enterocolitis (NEC)                                                                                                                                                                                                                                                                     | 5 (0.1%)           |
| Cranial imaging in infants $\leq$ 3 mos.                                                                                                                                                                                                                                                            | 0 (0%)             |
| Extreme temperature - $\leq$ 35 degrees Centigrade (35oC) <b>OR</b> $\geq$ 40 degrees Centigrade (40oC)                                                                                                                                                                                             | 116 (3.2%)         |
| Intubation / reintubation / Accidental extubation                                                                                                                                                                                                                                                   | 43 (1.2%)          |
| Emergent C-section delivery (Neonate Only)                                                                                                                                                                                                                                                          | 55 (1.5%)          |
| Dissatisfaction with care documented in the medical record and/or evidence of complaint lodged (including documented complaint, conflict between patient/family and staff, discharged against medical advice / Documentation or correspondence indicating litigation, either contemplated or actual | 55 (1.0%)          |
| Unexpected Death                                                                                                                                                                                                                                                                                    | 9 (0.2%)           |
| <b><i>ICU MODULE</i></b>                                                                                                                                                                                                                                                                            |                    |
| Readmission to ICU                                                                                                                                                                                                                                                                                  | 8 (0.2%)           |
| In Unit Procedure                                                                                                                                                                                                                                                                                   | 6 (0.2%)           |
| Failed ETT (failed intubation)                                                                                                                                                                                                                                                                      | 10 (0.3%)          |
| <b><i>LABORATORY MODULE</i></b>                                                                                                                                                                                                                                                                     |                    |
| Abrupt drop $\geq$ 25% Hgb or Hct                                                                                                                                                                                                                                                                   | 77 (2.1%)          |
| Platelet count < 50,000/mm <sup>3</sup> (50 X 10 <sup>9</sup> L)                                                                                                                                                                                                                                    | 29 (0.8%)          |
| PTT>100 secs or INR>6                                                                                                                                                                                                                                                                               | 10 (0.3%)          |
| D-dimer (positive by local lab normal)                                                                                                                                                                                                                                                              | 32 (0.9%)          |
| Sodium: 120 mmol/L > Na > 150 mmol/L                                                                                                                                                                                                                                                                | 25 (0.7%)          |

Appendix to: Matlow AG, Baker GR, Flintoft V, et al. Adverse events among children in Canadian hospitals: the Canadian Paediatric Adverse Events Study. *CMAJ* 2012. DOI:10.1503/cmaj112153.  
Copyright © 2012 Canadian Medical Association or its licensors

|                                                                                |                |
|--------------------------------------------------------------------------------|----------------|
| Potassium: 3.0 mmol/L > K+ > 6.0 mmol/L                                        | 91 (2.5%)      |
| Rising BUN/Creat > 2 x baseline                                                | 13 (0.4%)      |
| Hypoxia: O <sub>2</sub> Sat < 75%                                              | 50 (1.4%)      |
| Positive blood culture                                                         | 18 (0.5%)      |
| Gentamicin/Tobramycin: (except CF patients)<br>Trough <2 mg/L or Peak >10mg/L  | 33 (0.9%)      |
| <b>MEDICATION MODULE</b>                                                       |                |
| Vitamin K (excluding newborns)                                                 | 32 (0.9%)      |
| Heparin or Low Molecular Weight Heparin                                        | 40 (1.1%)      |
| <b>SURGICAL MODULE</b>                                                         |                |
| Unplanned or Return To surgery                                                 | 83 (2.3%)      |
| Intra-operative <b>IV</b> Epinephrine, Norepinephrine, Naloxone,<br>Flumazenil | 24 (0.7%)      |
| Removal / injury or repair of organ                                            | 13 (0.4%)      |
| Wrong site / wrong procedure / wrong patient                                   | 1 (0.0%)       |
| <b>OTHER MODULE</b>                                                            |                |
| <b>Other</b> / Any other undesirable outcomes not covered above                | 371<br>(10.1%) |
